# Supplementary material
Source: Frontiers journal article supplement (https://www.frontiersin.org/articles/476387)

**Supplementary Table A.** Characteristics of surveillance sites.

| Variables                    | Patients, N=30,322 | Study sites, N=90 |
|------------------------------|--------------------|-------------------|
|                              | n (%)              | n (%)             |
| <b>Hospital type</b>         |                    |                   |
| General                      | 22,062 (72.8)      | 55 (61.1)         |
| Traditional Chinese medicine | 3475 (11.5)        | 14 (15.6)         |
| District or county           | 2437 (8.0)         | 12 (13.3)         |
| Specialized                  | 2348 (7.8)         | 9 (10.0)          |
| <b>Hospital distribution</b> |                    |                   |
| North China                  | 8741(28.8)         | 26 (28.9)         |
| West China                   | 8684 (28.6)        | 21 (23.3)         |
| Central China                | 5684 (18.7)        | 12 (13.3)         |
| East China                   | 4286 (14.1)        | 17 (18.9)         |
| South China                  | 1380 (4.6)         | 4 (4.4)           |
| Northwest China              | 1099 (3.6)         | 7 (7.8)           |
| Northeast China              | 448 (1.5)          | 3 (3.3)           |

**Supplementary Table B.** The distribution of surveillance sites and sample sizes.

| Hospital                                                           | Area <sup>a</sup> | Provincial-level<br>administrative<br>region | City         | types <sup>b</sup> | Numbers of patients<br>enrolled in a<br>retrospective cohort | Numbers of<br>patients enrolled in<br>a prospective<br>cohort | AEs<br>(R/P) <sup>c</sup> | ADRs<br>(R/P) <sup>c</sup> |
|--------------------------------------------------------------------|-------------------|----------------------------------------------|--------------|--------------------|--------------------------------------------------------------|---------------------------------------------------------------|---------------------------|----------------------------|
| Beijing Luhe Hospital, Capital Medical University                  | NC                | Beijing                                      | Beijing      | G                  | /                                                            | 101                                                           | 10                        | 0                          |
| Peking University Third Hospital                                   | NC                | Beijing                                      | Beijing      | G                  | /                                                            | 50                                                            | 11                        | 1                          |
| Beijing Geriatric Hospital                                         | NC                | Beijing                                      | Beijing      | G                  | /                                                            | 66                                                            | 0                         | 0                          |
| The 263rd Hospital of Chinese People's Liberation Army             | NC                | Beijing                                      | Beijing      | D/C                | /                                                            | 304                                                           | 9                         | 1                          |
| Fengtai district Hospital of Chinese and Western medicine, Beijing | NC                | Beijing                                      | Beijing      | T                  | /                                                            | 99                                                            | 3                         | 0                          |
| The 464th Hospital of Chinese People's Liberation Army             | NC                | Tianjin                                      | Tianjin      | G                  | 98                                                           | 335                                                           | 8/2                       | 0                          |
| The 254th Hospital of Chinese People's Liberation Army             | NC                | Tianjin                                      | Tianjin      | G                  | 86                                                           | 64                                                            | 0                         | 0                          |
| First Hospital of Handan City                                      | NC                | Hebei                                        | Handan       | G                  | 732                                                          | 1792                                                          | 55/33                     | 5/2                        |
| Bethune International Peace Hospital of the Chinese PLA            | NC                | Hebei                                        | Shijiazhuang | G                  | /                                                            | 513                                                           | 0                         | 0                          |
| People's Hospital of Cangzhou                                      | NC                | Hebei                                        | Cangzhou     | G                  | 440                                                          | 553                                                           | 3/1                       | 0                          |
| The First Hospital of Qinhuangdao                                  | NC                | Hebei                                        | Qinhuangdao  | G                  | 333                                                          | 1178                                                          | 59/9                      | 0/2                        |
| The Second Hospital of Hebei Medical University                    | NC                | Hebei                                        | Shijiazhuang | G                  | /                                                            | 306                                                           | 15                        | 3                          |
| People's Hospital of Rongcheng                                     | NC                | Hebei                                        | Baoding      | D/C                | /                                                            | 131                                                           | 1                         | 0                          |
| Hebei Zhaoxian People's Hospital                                   | NC                | Hebei                                        | Shijiazhuang | D/C                | /                                                            | 102                                                           | 0                         | 0                          |
| Hejian Municipal People's Hospital                                 | NC                | Hebei                                        | Hejian       | D/C                | /                                                            | 229                                                           | 0                         | 0                          |
| Xinle Municipal Hospital of Hebei                                  | NC                | Hebei                                        | Xinle        | D/C                | /                                                            | 271                                                           | 0                         | 0                          |
| The Second Hospital of Wulanchabu City                             | NC                | Neimenggu                                    | Wulanchabu   | D/C                | /                                                            | 153                                                           | 2                         | 0                          |
| The Third Affiliated Hospital of Inner Mongolia Medical College    | NC                | Neimenggu                                    | Baotou       | G                  | /                                                            | 142                                                           | 0                         | 0                          |
| The fourth Hospital of Inner Mongolia                              | NC                | Neimenggu                                    | Huhehaote    | G                  | /                                                            | 170                                                           | 3                         | 3                          |
| The First Hospital Of Huhhot                                       | NC                | Neimenggu                                    | Huhehaote    | G                  | /                                                            | 70                                                            | 0                         | 0                          |
| Fenyang Hospital of Shanxi Province                                | NC                | Shanxi                                       | Fenyang      | G                  | /                                                            | 70                                                            | 1                         | 0                          |
| The Fifth People's Hospital of Datong                              | NC                | Shanxi                                       | Datong       | G                  | /                                                            | 52                                                            | 1                         | 1                          |

|                                                                              |    |          |           |     |    |      |    |    |
|------------------------------------------------------------------------------|----|----------|-----------|-----|----|------|----|----|
| The Center Hospital of Shuozhou                                              | NC | Shanxi   | Shuozhou  | G   | /  | 39   | 1  | 1  |
| The Second People's Hospital of Jinzhong                                     | NC | Shanxi   | Jinzhong  | G   | /  | 31   | 2  | 2  |
| Shanxi Maternity and Children Health Hospital                                | NC | Shanxi   | Taiyuan   | S   | /  | 131  | 0  | 0  |
| Maternal and Child Health Care Hospital of Taiyuan                           | NC | Shanxi   | Taiyuan   | S   | /  | 100  | 0  | 0  |
| Second Hospital of Jilin University                                          | NE | Jilin    | Changchun | G   | /  | 302  | 4  | 4  |
| First Hospital of Jilin University                                           | NE | Jilin    | Changchun | G   | /  | 116  | 1  | 0  |
| Shenyang 242 Hospital                                                        | NE | Liaoning | Shenyang  | G   | /  | 30   | 2  | 2  |
| Anhui Provincial Children's Hospital                                         | EC | Anhui    | Hefei     | S   | /  | 50   | 0  | 0  |
| Wenzhou Central Hospital                                                     | EC | Zhejiang | Wenzhou   | G   | /  | 102  | 0  | 0  |
| Affiliated Yueqing Hospital of Wenzhou Medical University                    | EC | Zhejiang | Yueqing   | G   | /  | 377  | 0  | 0  |
| Ningbo No. 1 Hospital                                                        | EC | Zhejiang | Ningbo    | G   | /  | 319  | 13 | 13 |
| The 2nd Affiliated Hospital and Yuying Children's Hospital of WMU            | EC | Zhejiang | Wenzhou   | G   | /  | 108  | 0  | 0  |
| Zhejiang Provincial Hospital of TCM                                          | EC | Zhejiang | Hangzhou  | T   | /  | 301  | 0  | 0  |
| Shanghai Changzheng Hospital                                                 | EC | Shanghai | Shanghai  | G   | 33 | 67   | 0  | 0  |
| Shanghai Ninth People's Hospital Affiliated to Shanghai Jiao Tong University | EC | Shanghai | Shanghai  | G   | /  | 118  | 0  | 0  |
| Shanghai Minhang District Central Hospital                                   | EC | Shanghai | Shanghai  | D/C | /  | 317  | 0  | 0  |
| Shanghai First People's Hospital Branch                                      | EC | Shanghai | Shanghai  | D/C | /  | 159  | 5  | 3  |
| Wu Song Central Hospital of Shanghai                                         | EC | Shanghai | Shanghai  | D/C | /  | 139  | 1  | 0  |
| Jiangning District Hospital of Traditional Chinese Medicine                  | EC | Jiangsu  | Nanjing   | T   | /  | 100  | 1  | 0  |
| Yangzhou No.1 People's Hospital                                              | EC | Jiangsu  | Yangzhou  | G   | /  | 510  | 0  | 0  |
| Yantai Municipal Laiyang Central Hospital                                    | EC | Shandong | Laiyang   | G   | /  | 100  | 2  | 1  |
| Shandong Cancer Hospital                                                     | EC | Shandong | Jinan     | S   | /  | 435  | 5  | 0  |
| Affiliated hospital of Shandong University of traditional Chinese medicine   | EC | Shandong | Jinan     | T   | /  | 50   | 0  | 0  |
| Xintai People's Hospital                                                     | EC | Shandong | Xintai    | G   | /  | 1001 | 0  | 0  |
| Shenzhen Third People's Hospital                                             | SC | Shenzhen | Shenzhen  | G   | /  | 481  | 0  | 0  |

|                                                                           |    |           |            |     |     |      |     |     |
|---------------------------------------------------------------------------|----|-----------|------------|-----|-----|------|-----|-----|
| The Affiliated Hospital of Hainan medical College                         | SC | Hainan    | Haikou     | G   | 98  | 386  | 0/1 | 0   |
| Zhongshan People's Hospital                                               | SC | Guangdong | Zhongshan  | G   | /   | 185  | 0   | 0   |
| The Third People's Hospital of Huizhou                                    | SC | Guangdong | Huizhou    | D/C | /   | 230  | 1   | 1   |
| The 44th Hospital of chinese People's Liberation Army                     | WC | Guizhou   | Guiyang    | G   | /   | 227  | 1   | 1   |
| Bijie First Municipal People's Hospital                                   | WC | Guizhou   | Bijie      | G   | /   | 303  | 14  | 4   |
| Affiliated hospital of Zunyi Medical College                              | WC | Guizhou   | Zunyi      | G   | /   | 151  | 0   | 0   |
| Guiyang Pulmonary Hospital                                                | WC | Guizhou   | Guiyang    | S   | 94  | 170  | 0   | 0   |
| Guizhou Cancer Hospital                                                   | WC | Guizhou   | Guiyang    | S   | /   | 303  | 3   | 1   |
| Guiyang Children's Hospital                                               | WC | Guizhou   | Guiyang    | S   | 70  | 217  | 0   | 0   |
| The First Affiliated Hospital of Kunming Medical College                  | WC | Yunnan    | Kunming    | G   | 390 | 819  | 0/1 | 0   |
| The Second Affiliated Hospital of Kunming Medical University              | WC | Yunnan    | Kunming    | G   | 1   | 507  | 0/2 | 0   |
| Traditional Chinese Medical Hospital of Bai Autonomous Prefecture of Dali | WC | Yunnan    | Dali       | T   | 16  | 65   | 5   | 0   |
| West China Hospital, Sichuan University                                   | WC | Sichuan   | Chengdu    | G   | /   | 673  | 7   | 7   |
| Sichuan Provincial People's Hospital                                      | WC | Sichuan   | Chengdu    | G   | /   | 150  | 0   | 0   |
| The Third People's Hospital of Chengdu                                    | WC | Sichuan   | Chengdu    | G   | /   | 1074 | 1   | 1   |
| Shuang Liu Hospital of Traditional Chinese Medical                        | WC | Sichuan   | Chengdu    | T   | /   | 364  | 1   | 1   |
| People's Hospital of Nanbu County                                         | WC | Sichuan   | Nanchong   | D/C | /   | 102  | 1   | 0   |
| DuJiangyan Traditional Chinese Medicine Hospital                          | WC | Sichuan   | Dujiangyan | T   | /   | 76   | 0   | 0   |
| Chongqing Traditional Chinese Medicine Hospital                           | WC | Chongqing | Chongqing  | T   | /   | 603  | 17  | 0   |
| The Third People's Hospital of Chongqing                                  | WC | Chongqing | Chongqing  | G   | /   | 120  | 6   | 1   |
| Chongqing Kaixian County People's Hospital                                | WC | Chongqing | Chongqing  | G   | /   | 323  | 0   | 0   |
| Chongqing Three Gorges Central Hospital                                   | WC | Chongqing | Chongqing  | G   | 1   | 1407 | 0/8 | 0/4 |
| The Second Affiliated Hospital of Chongqing Medical University            | WC | Chongqing | Chongqing  | G   | /   | 158  | 1   | 1   |
| Chongqing Jiulongpo First People's Hospital                               | WC | Chongqing | Chongqing  | D/C | /   | 300  | 0   | 0   |
| Lanzhou Petrochemical General Hospital                                    | NW | Gansu     | Lanzhou    | G   | /   | 97   | 2   | 0   |

|                                                                            |    |         |              |   |      |        |         |      |
|----------------------------------------------------------------------------|----|---------|--------------|---|------|--------|---------|------|
| Gansu Provincial Hospital of TCM                                           | NW | Gansu   | Lanzhou      | T | /    | 301    | 1       | 0    |
| People's Hospital of Xinjiang Uigur Autonomous Region                      | NW | Xijiang | Wulumuqi     | G | /    | 188    | 1       | 0    |
| General Hospital of Ningxia Medical University                             | NW | Ningxia | Yinchuan     | G | /    | 301    | 3       | 1    |
| The First People's Hospital of Yinchuan                                    | NW | Ningxia | Yinchuan     | G | /    | 100    | 5       | 0    |
| Traditional Chinese Medicine Hospital of the Ningxia Hui Autonomous Region | NW | Ningxia | Yinchuan     | T | /    | 50     | 0       | 0    |
| Qinghai Women and Childhood Hospital                                       | NW | Qinghai | Xining       | S | /    | 62     | 0       | 0    |
| The First Hospital of Nanchang                                             | CC | Jiangxi | Nanchang     | G | /    | 300    | 5       | 3    |
| Jiangxi Provincial People's Hospital                                       | CC | Jiangxi | Nanchang     | G | /    | 435    | 5       | 2    |
| Traditional Chinese Medical Hospital of Jiangxi Province                   | CC | Jiangxi | Nanchang     | T | /    | 252    | 1       | 1    |
| The Second Hospital of Nanchang                                            | CC | Jiangxi | Nanchang     | T | /    | 101    | 1       | 0    |
| The Fourth Hospital of Changsha                                            | CC | Hunan   | Changsha     | G | /    | 135    | 1       | 0    |
| The second Xiangya Hospital of Central South University                    | CC | Hunan   | Changsha     | G | /    | 50     | 1       | 1    |
| The 152nd Hospital of Chinese People's Liberation Army                     | CC | Henan   | Pingdingshan | G | /    | 2344   | 10      | 4    |
| The First Affiliated Hospital of Zhengzhou University                      | CC | Henan   | Zhengzhou    | G | /    | 151    | 0       | 0    |
| Henan Province Hospital of TCM                                             | CC | Henan   | Zhengzhou    | T | /    | 302    | 3       | 3    |
| Hubei Zhongshan Hospital Affiliated to Wuhan University                    | CC | Hubei   | Wuhan        | G | 2    | 101    | 2       | 0    |
| Hubei Cancer Hospital                                                      | CC | Hubei   | Wuhan        | S | 3    | 713    | 0/21    | 0    |
| Hubei Xinhua Hospital                                                      | CC | Hubei   | Wuhan        | T | 346  | 449    | 24/15   | 0    |
| Total cases                                                                |    |         |              |   | 2743 | 27,579 | 149/285 | 5/76 |

a. EC=East China, SC=South China, WC=West China, NE=Northeast, NC=North China, NW=Northwest, CC=Central China

b. G=General Hospital, S=Specialized hospital, T= Traditional Chinese medicine hospital, D/C=District / County hospital

c. R/P: ADR cases in retrospective cohort/prospective cohort

**Supplementary Table 3.** The distribution of off-label use. Data are n (%).

| Item                       | Product label                                                                                                                                                                                                                              | Off-label use                                                                                                                                  | Patients with off-label use, N=30,322 |
|----------------------------|--------------------------------------------------------------------------------------------------------------------------------------------------------------------------------------------------------------------------------------------|------------------------------------------------------------------------------------------------------------------------------------------------|---------------------------------------|
| Dosage                     | 0-40 ml                                                                                                                                                                                                                                    | >40 ml                                                                                                                                         | 22 (0.1)                              |
| Diluent                    | 5% glucose or 0.9% normal saline                                                                                                                                                                                                           | Beyond 5% glucose or 0.9% normal saline, i.e., fructose injection                                                                              | 2058 (6.8)                            |
| Preparation concentration  | 0-10 %                                                                                                                                                                                                                                     | >10 %                                                                                                                                          | 11807 (38.9)                          |
| Mode of administration way | Intravenous infusion                                                                                                                                                                                                                       | Beyond intravenous infusion, i.e., aerosol inhalation.                                                                                         | 6 (0.02)                              |
| Infusion rate              | 30–60 drops/min                                                                                                                                                                                                                            | <30 drops/min                                                                                                                                  | 2508 (8.3)                            |
|                            |                                                                                                                                                                                                                                            | >60 drops/min                                                                                                                                  | 659 (2.2)                             |
| Compatibility              | Prohibition of being administered with other drugs within a same bottle/ bag                                                                                                                                                               | Administered TRQ with other drugs within a same bottle/ bag                                                                                    | 173 (0.6)                             |
| TCM diagnosis              | Disease presenting as wind-warm pulmonary diseases; or syndrome presenting as retention of phlegm-heat in the lung                                                                                                                         | Syndromes beyond phlegm-heat, phlegm-fire, pyretic pulmonary and wind-heat, or presenting as exterior cold syndrome                            | 852 (2.8)                             |
| Diagnosis                  | Acute upper respiratory infections, pneumonia, or acute exacerbation of chronic obstructive pulmonary disease                                                                                                                              | Diseases beyond infections and infestations (MedDRA SOC:10006451), and respiratory, thoracic, and mediastinal disorders (MedDRA SOC: 10006458) | 6309 (20.8)                           |
| Special populations        | Be contraindicated in patients with a history of allergy (being allergic to TRQ or alcohol, or having an allergic constitution), hepatic or renal failure, severe pulmonary heart disease with heart failure, pregnant or aged < 24 months | Patients with a history of allergy                                                                                                             | 2326 (7.7)                            |
|                            |                                                                                                                                                                                                                                            | Patients with hepatic or renal failure                                                                                                         | 413 (1.4)                             |
|                            |                                                                                                                                                                                                                                            | Patients having severe pulmonary heart disease with heart failure                                                                              | 12 (0.04)                             |
|                            |                                                                                                                                                                                                                                            | Pregnancy women                                                                                                                                | -                                     |
|                            |                                                                                                                                                                                                                                            | Infant aged < 24 months                                                                                                                        | 1165 (3.8)                            |
| Total                      |                                                                                                                                                                                                                                            |                                                                                                                                                | 20058 (66.1)                          |

**Supplementary Table D.** Top 10 combined treatments

| Treatment subgroup (ATC codes)                        | Drug Records, N=30055 |
|-------------------------------------------------------|-----------------------|
|                                                       | n (%)                 |
| Antibacterials for systemic use (J01)                 | 23,105 (76.9)         |
| Blood substitutes and perfusion solutions (B05)       | 17,254 (57.4)         |
| Cough and cold preparations (R05)                     | 15,847 (52.7)         |
| Drugs for acid-related disorders (A02)                | 12,107 (40.3)         |
| Drugs for obstructive airway diseases (R03)           | 11,691 (38.9)         |
| Vitamins (A11)                                        | 11,175 (37.2)         |
| Mineral supplements (A12)                             | 9763 (32.5)           |
| Corticosteroids for systemic use (H02)                | 7650 (25.5)           |
| Analgesics (N02)                                      | 7641 (25.4)           |
| Cardiac therapy (C01)                                 | 6375 (21.2)           |
| Antithrombotic agents (B01)                           | 5853 (19.5)           |
| Antihemorrhagics (B02)                                | 4793 (16.0)           |
| Drugs for functional gastrointestinal disorders (A03) | 4781 (15.9)           |
| Antiviral for systemic use (J02)                      | 4456 (14.8)           |
| Immunostimulants (L03)                                | 4068 (13.5)           |
| Drug used in diabetes (A10)                           | 3982 (13.2)           |
| Diuretics (C03)                                       | 3709 (12.3)           |
| Anesthetics (N01)                                     | 3556 (11.8)           |
| Calcium channel blockers (C08)                        | 3377 (11.2)           |



**Supplementary Figure A.** Distribution of surveillance sites and samples

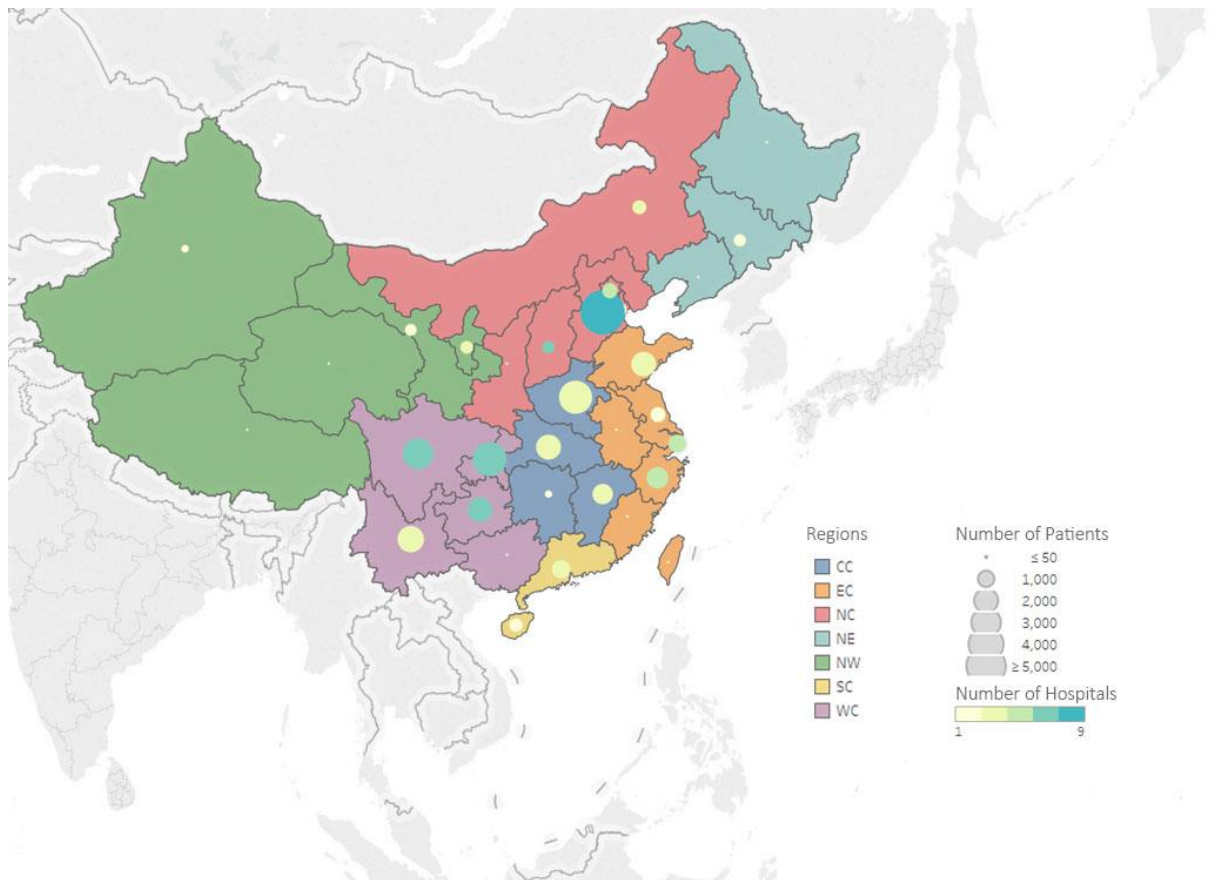

Characteristics of surveillance sites and samples are showed. The colors represents the different regions surveillance sites located. For each circle, the size indicates the number of patients, while the gradation of color presents the number of hospitals in this province.

EC, East China; SC, South China; WC, West China; NE, Northeast; NC, North China; NW, Northwest; CC, Central China.

**Supplementary Figure B.** The age distribution of the study cohort.

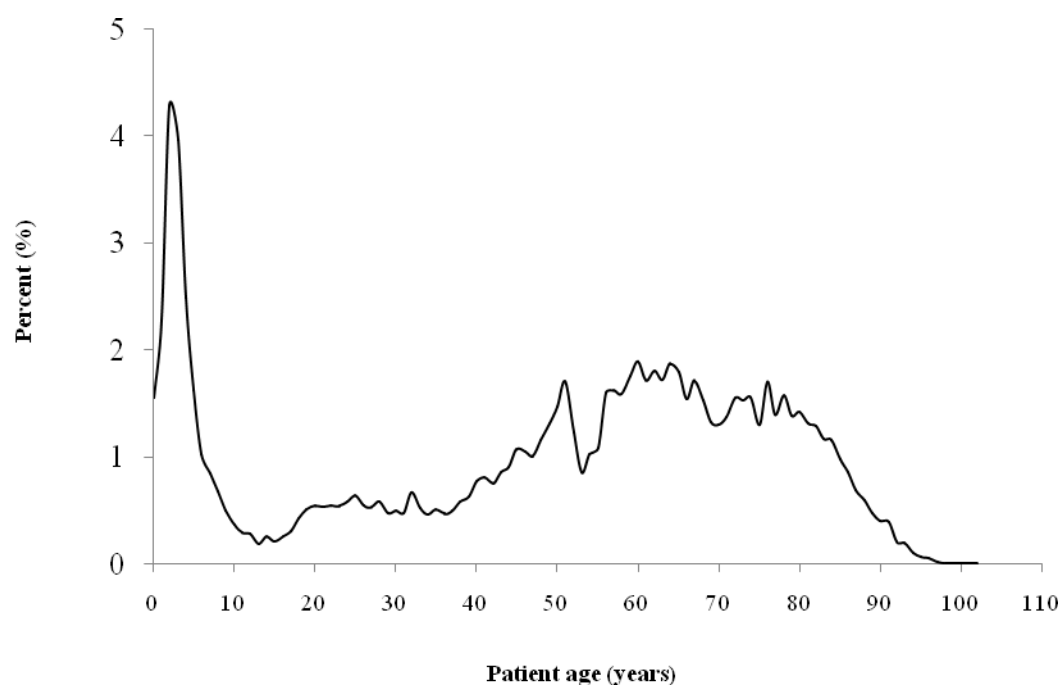

Supplement: Data_Sheet_1.pdf [file Data_Sheet_1.pdf]
